# Supplementary material
Source: bioRxiv or medRxiv preprint supplement (https://medrxiv.org/highwire/filestream/83120/field_highwire_adjunct_files/0/2020.05.25.20112805-1.pdf)
Supplement: Supplementary file [file 2020.05.25.20112805-1.pdf]

## SUPPLEMENTARY MATERIALS

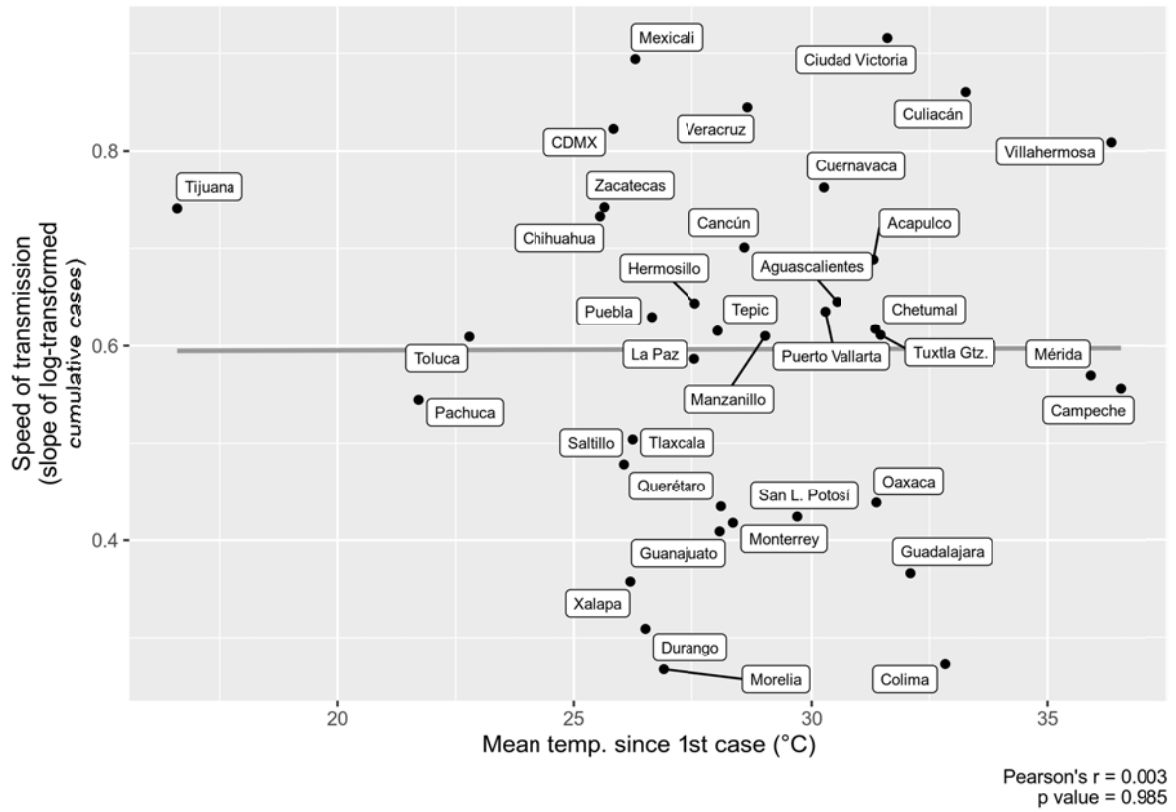

SM Figure 1: Relation of rate of transmission of COVID-10 to temperature

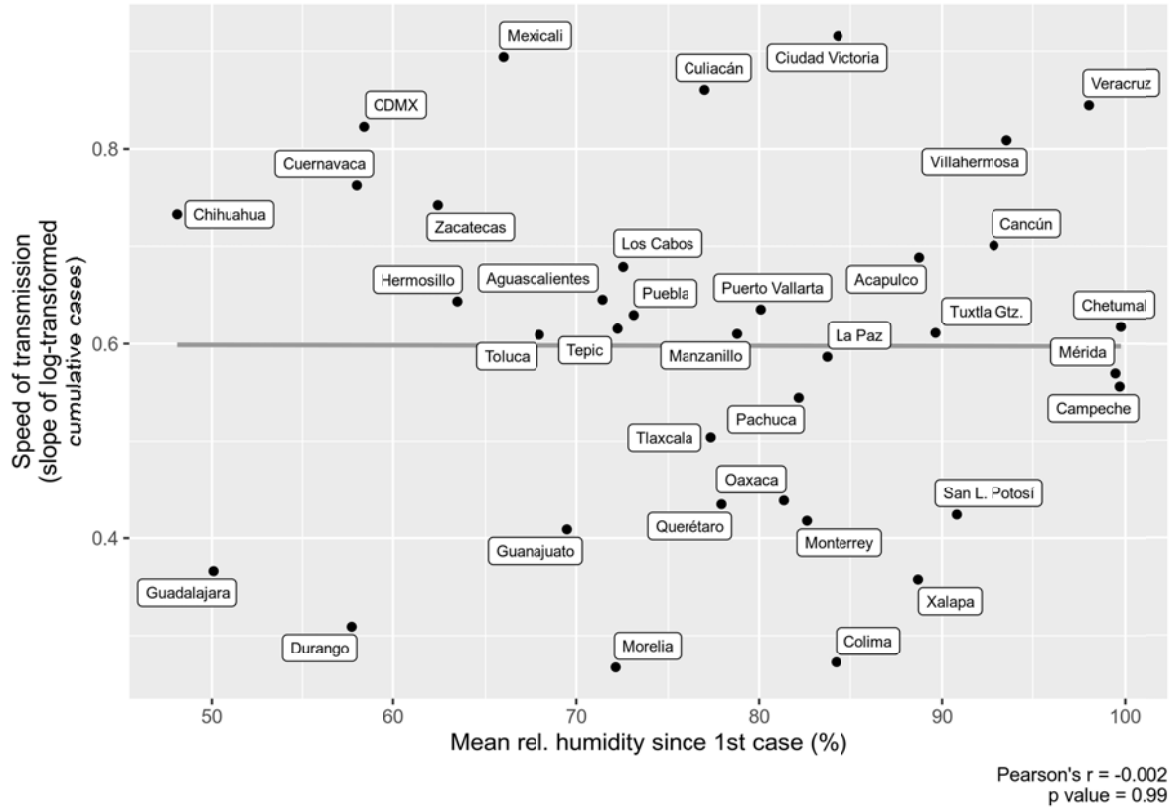

SM Figure 2: Relation of rate of transmission of COVID-19 to humidity

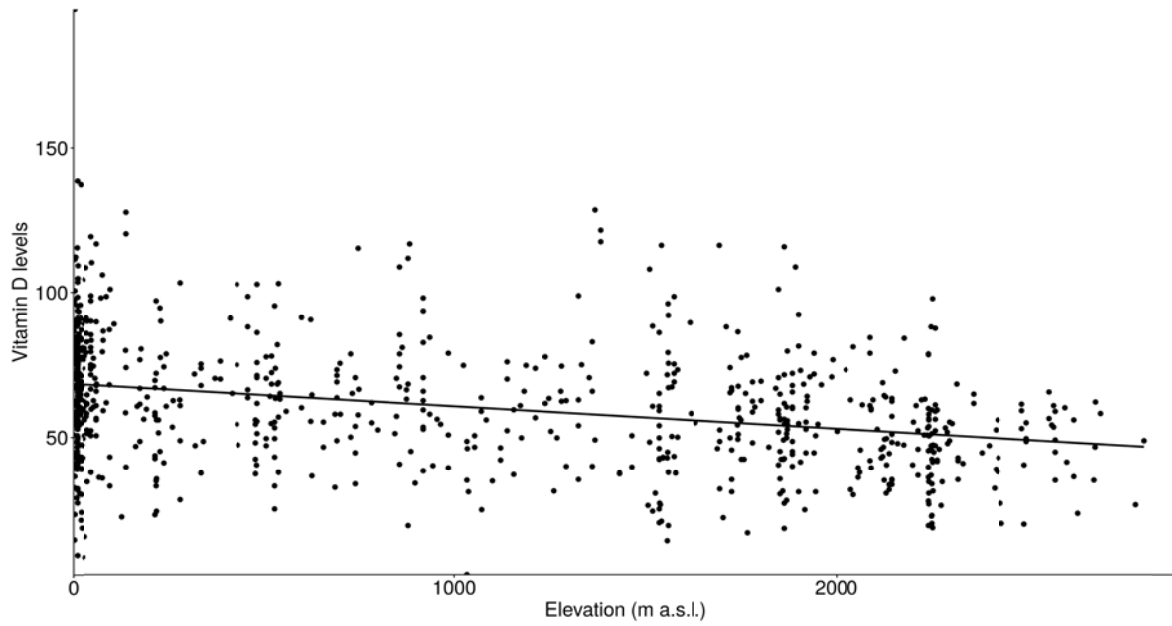

**SM Figure 3: The relation of elevation with Vitamin D levels in a sample of the Mexican population, as measured in a national health and nutrition survey**

Vitamin D units: nmol/L. Data from Secretaria de Salud/INEGI (2018).

| City                       | PM10 | PM2.5 | Ozone | SO2 | NO3 | CO |
|----------------------------|------|-------|-------|-----|-----|----|
| Aguascalientes             |      |       |       |     |     |    |
| Tijuana                    |      |       |       |     |     |    |
| Mexicali                   |      |       |       |     |     |    |
| Los Cabos                  |      |       |       |     |     |    |
| La Paz                     |      |       |       |     |     |    |
| Campeche                   |      |       |       |     |     |    |
| San Cristobal de las Casas |      |       |       |     |     |    |
| Tuxla                      |      |       |       |     |     |    |
| CDMX                       |      |       |       |     |     |    |
| Chihuahua                  |      |       |       |     |     |    |
| Ciudad Juarez              |      |       |       |     |     |    |
| Saltillo                   |      |       |       |     |     |    |
| Monclova                   |      |       |       |     |     |    |
| Colima                     |      |       |       |     |     |    |
| Manzanillo                 |      |       |       |     |     |    |
| Durango                    |      |       |       |     |     |    |
| Guanajuato                 |      |       |       |     |     |    |
| Leon                       |      |       |       |     |     |    |
| Acapulco                   |      |       |       |     |     |    |
| Pachuca                    |      |       |       |     |     |    |
| Guadalajara                |      |       |       |     |     |    |
| Puerto Vallarta            |      |       |       |     |     |    |
| Toluca                     |      |       |       |     |     |    |
| Morelia                    |      |       |       |     |     |    |
| Cuernavaca                 |      |       |       |     |     |    |
| Tepic                      |      |       |       |     |     |    |
| Monterrey                  |      |       |       |     |     |    |
| Oaxaca                     |      |       |       |     |     |    |
| Huatulco Smaria            |      |       |       |     |     |    |
| Puebla                     |      |       |       |     |     |    |
| Queretaro                  |      |       |       |     |     |    |
| Cancun                     |      |       |       |     |     |    |
| Chetumal                   |      |       |       |     |     |    |
| San L Potosi               |      |       |       |     |     |    |
| Culiacan                   |      |       |       |     |     |    |
| Hermosillo                 |      |       |       |     |     |    |
| Villahermosa               |      |       |       |     |     |    |
| Ciudad Victoria            |      |       |       |     |     |    |
| Reynosa                    |      |       |       |     |     |    |
| Tlaxcala                   |      |       |       |     |     |    |

|           |  |  |  |  |  |  |
|-----------|--|--|--|--|--|--|
| Veracruz  |  |  |  |  |  |  |
| Xalapa    |  |  |  |  |  |  |
| Merida    |  |  |  |  |  |  |
| Zacatecas |  |  |  |  |  |  |

**Legend:**  Complies  Fails Blank cells: no data

**SM Figure 4: Compliance of cities with Mexican air pollution standards, 2015.**

Data from Semarnat (2014) Informe del Medio Ambiente, ch.5: Atmósfera.  
[apps1.semarnat.gob.mx:8443/dgeia/informe15/tema/pdf/Cap5\\_atmosfera.pdf](https://apps1.semarnat.gob.mx:8443/dgeia/informe15/tema/pdf/Cap5_atmosfera.pdf)
